**Cancer-specific overmethylation of histone H3 lysines is linked with methionine addiction and malignancy**

Authors: *Jun Yamamoto*<sup>1,2,3</sup>, *Sachiko Inubushi*<sup>1,2</sup>, *Qinghong Han*<sup>1</sup>, *Yoshihiko Tashiro*<sup>1,2</sup>, *Yu Sun*<sup>1,2</sup>, *Norihiko Sugisawa*<sup>1,2</sup>, *Kazuyuki Hamada*<sup>1,2</sup>, *Hiroto Nishino*<sup>1,2</sup>, *Yusuke Aoki*<sup>1,2</sup>, *Kentaro Miyake*<sup>3</sup>, *Ryusei Matsuyama*<sup>3</sup>, *Michael Bouvet*<sup>2</sup>, *Itaru Endo*<sup>3</sup>, and *Robert M. Hoffman*<sup>1,2</sup>

<sup>1</sup> AntiCancer Inc, 7917 Ostrow St, San Diego, CA, 92111, USA

<sup>2</sup> Department of Surgery, University of California, San Diego, 9300 Campus Point Drive  
#7220, La Jolla, CA, 92037-7220, USA

<sup>3</sup> Department of Gastroenterological Surgery, Yokohama City University Graduate School of  
Medicine, 3-9 Fukuura, Kanazawa-ku, Yokohama, 236-0004, Japan

Address correspondence to:

Robert M. Hoffman, PhD

AntiCancer Inc, 7917 Ostrow St, San Diego, CA, 92111, USA

Phone: +1 858-654-2555, Fax: +1-858-268-4175

E-mail: [all@anticancer.com](mailto:all@anticancer.com)

Itaru Endo, MD, PhD

Department of Gastroenterological Surgery, Yokohama City University Graduate School of

Medicine, 3-9 Fukuura, Kanazawa-ku, Yokohama, 236-0004, Japan

Phone: +81-45-787-2650, Fax: +81-45-782-9161

E-mail: [endoit@yokohama-cu.ac.jp](mailto:endoit@yokohama-cu.ac.jp)

Jun Yamamoto, MD,

AntiCancer Inc, 7917 Ostrow St, San Diego, CA, 92111, USA

Phone: +1 858-654-2555, Fax: +1-858-268-4175

E-mail: [jun.ymmt.1014@gmail.com](mailto:jun.ymmt.1014@gmail.com)

### **Author Contributions**

J.Y. and R.M.H designed and performed experiments and wrote the paper; S.I., N.S., Y.S.,

K.H., Y.T., Y.A., H.N. K.M., R.M. and M.B. gave technical support and conceptual advice.

Writing, review, and/or revision of the manuscript: J.Y., I.E. and R.M.H.

### **Key words**

Methionine addiction, methionine dependence, histone H3 lysine overmethylation,

methionine-independent revertant, methionine restriction

**Word count:** 3968 words

**Figure:** 1 to 4

## Abstract

Methionine addiction is a fundamental and general hallmark of cancer and is an area of current intense interest. Methionine addiction results from the overuse of methionine by cancer cells for excess transmethylation reactions. In order to identify excess transmethylation reactions in cancer and further understand the basis of methionine addiction, we compared the histone H3 lysine methylation status between methionine-addicted cancer cells, normal cells and rare revertants of methionine-addicted cancer cells which regained methionine independence and lost malignancy. The levels of H3K4me3, H3K9me3 and H3K36me3 were strongly elevated in methionine-addicted cancer cells *in vitro* compared to methionine-independent revertants isolated from the cancer cells. Tumorigenicity and experimental metastatic potential in nude mice were highly reduced in the methionine-independent revertants compared to the parental cells. Our previous studies showed that methionine restriction (MR) selectively arrests methionine-addicted cancer cells due to loss of histone H3 lysine methylation which was stable in normal cells under MR. Our previous and present results suggest that overmethylation of histone H3 lysine is linked with methionine addiction of cancer, required for the growth of cancer cells *in vitro* and *in vivo*, and necessary for malignancy as the histone lysine overmethylation disappears when the methionine-addicted cells revert to methionine independence and reduced malignancy. Methionine addiction has revealed fundamental molecular changes necessary for malignancy and presents great potential as a pan-cancer therapeutic target.

## Introduction

Methionine addiction is a fundamental and general hallmark of cancer and is an area of current intense interest<sup>1-5</sup>. Methionine addiction is characterized by a requirement for exogenous methionine for growth by cancer cells even though the methionine-addicted cancer cells synthesize normal or excess amounts of methionine<sup>6</sup>. Methionine-addicted cancer cells, require much larger amounts of exogenous methionine than normal cells in order to grow, hence their methionine addiction and dependence<sup>6-9</sup>. Methionine restriction (MR) by either methionine-free medium<sup>10,11</sup> or by a low-methionine diet<sup>12</sup> or by methioninase<sup>13</sup> selectively arrests cancer cells in the late S/G<sub>2</sub> phase of the cell cycle, but not normal cells or methionine-independent revertants, where the cancer cells become sensitive to cytotoxic chemotherapy<sup>11,13,14</sup>. Methionine addiction results from the overuse of methionine by cancer cells for excess transmethylation reactions, termed the Hoffman-effect, analogous to the Warburg effect for glucose overuse by cancer cells<sup>15,16</sup>. Methionine addiction is tightly linked to other hallmarks of cancer<sup>17,18</sup> and was thought possibly the very basis of malignancy itself<sup>19</sup>.

Although we have long since known methionine is overused for transmethylation reactions cancer cells<sup>15,20</sup>, we have poorly understood the fate of at least a significant amount of the excess methyl groups that were transferred. Our previous studies have shown that histone H3 lysine marks are overmethylated in cancer cells compared to normal cells and that the histone H3 lysine overmethylation is unstable during MR of methionine-addicted cancer cells and arrests their proliferation. In contrast histone H3 lysine is stable in normal cells under MR, which unlike cancer cells does not arrest their proliferation. These results suggested that histone H3 lysine methylation may be related to methionine addiction.

In the present study, we report that the lysines of histone H3, and specifically histone

H3K4me3 and H3K9me3 are over-methylated in methionine-addicted cancer cells, compared to low-malignant methionine-independent revertants derived from high-malignant methionine-addicted the cancer cells and compared to normal human fibroblasts. Our results suggest that histone H3 lysine overmethylation is necessary for methionine addiction, and is required for the growth of the cancer cells *in vitro* and *in vivo*, and thus is necessary for malignancy.

## **Materials and Methods**

### **Cell culture**

The H460 human lung cancer cell line, HCT 116 human colon cancer cell line, MIA PaCa-2 human pancreatic cancer cell line and Hs27 human normal foreskin fibroblast cell line were used in the present study. HCT 116 cells were stably transduced to express green fluorescent protein (GFP) as previously described<sup>21</sup> and used for an *in vivo* experimental metastatic study. All cell lines were obtained from the American Type Culture Collection (Manassas, VA, USA). Cells were maintained in DMEM supplemented with 10% fetal bovine serum (FBS) and 100 IU/ml penicillin/streptomycin.

### **Recombinant methioninase production**

Recombinant L-methionine  $\alpha$ -deamino- $\gamma$ -mercapto-methane lyase (rMETase) is a 172-kDa molecular homotetrameric PLP enzyme<sup>22</sup>. The rMETase gene was cloned in *E.coli*. Fermentation of rMETase-recombinant *E. coli* and purification of rMETase were performed as described<sup>23</sup>.

### **Selection and establishment of methionine-independent revertant cancer cells**

The H460, HCT 116 and MIA PaCa-2 parental cell lines were cultured in medium with 1 U/ml of rMETase for more than one month as a first selection and surviving cells were isolated. These surviving cells were cultured in medium with 5 U/ml rMETase for more than 2 weeks as a second selection and surviving cells were isolated. The surviving cells isolated after the second selection were termed H460-R, HCT 116-R and MIA PaCa-2-R cells, respectively.

### **rMETase activity assay in vitro**

Medium with 1 U/ml of rMETase were incubated and the methionine levels in the medium were measured with an HPLC (Hitachi L-6200A Intelligent pump; Hitachi, Ltd., Tokyo, Japan) before and after added rMETase as described previously<sup>24</sup>.

### **Efficacy of MR, effected by rMETase, on cell proliferation**

Cells were cultured in 96-well plates ( $1 \times 10^3$  cells/well) in normal DMEM overnight. The next day, the medium was changed to normal DMEM or DMEM with rMETase (1 U/ml). Cell proliferation was measured using the Cell Counting Kit-8 (Dojindo, Kumamoto, Japan) after 0, 24, 48, 72 and 96 hours of medium change. The medium after 96 hours of culture was collected and the methionine level in the medium was measured with HPLC. Experiments were performed three times, each in triplicate.

### **Efficacy of rMETase on viability of methionine-addicted parental cancer-cells and methionine-independent revertant**

Cells were cultured in 96-well plates ( $1 \times 10^3$  cells/well) in normal DMEM overnight. The next day, cells were treated with rMETase between 0.1 U/ml and 6.4 U/ml. Cell viability was measured after 96 h of treatment using Cell Counting Kit-8 (Dojindo).

Sensitivity curves and IC50 values were calculated as described previously<sup>4</sup>.

## **Immunoblotting**

Extraction of histone from cells and tumors and immunoblotting were performed as described<sup>25</sup>. Anti-H3K4me3 antibody (1:1,000, #9751, Cell Signaling Technology, Danvers, MA, USA); anti-H3K9me3 antibody (1:1,000, #13969, Cell Signaling Technology); anti-H3K27me3 antibody (1:1,000, #9733, Cell Signaling Technology); anti-H3K36me3 antibody (1:1,000, #4909, Cell Signaling Technology); anti-H3K79me3 antibody (1:1,000, #74073, Cell Signaling Technology); or anti-pan methyl lysine antibody (1:2,000, ab7315, Abcam, Cambridge, UK) for detection of pan methyl lysine of histone H3 were used as primary antibodies. Total histone H3 was used as the internal loading control (1:2,000, #4499, Cell Signaling Technology). Horseradish-peroxidase-conjugated anti-rabbit IgG (1:20,000, SA00001-2, Proteintech, Rosemont, IL, USA) was used for secondary antibody. Immunoreactive proteins were visualized with Clarity Western ECL Substrate (Bio-Rad Laboratories, Hercules, CA, USA). The UVP ChemStudio (Analytik Jena US LLC, Upland, CA, USA) was used to detect the signals. The signals of H3K4me3, H3K9me3, H3K27me3, H3K36me3, H3K79me3 and pan methyl lysine of histone H3 were normalized to the total histone H3 signal for quantification.

## **Mouse studies**

4-6 weeks old athymic *nu/nu* female mice (AntiCancer Inc, San Diego, CA, USA), were used in this study. All mice were kept in a barrier facility on a high efficacy particulate air (HEPA)-filtered rack under standard conditions of 12 h light/dark cycles. Animal studies were performed with an AntiCancer Institutional Animal Care and Use Committee (IACUC)-protocol specially approved for this study and in accordance with the principles and

procedures outlined in the National Institutes of Health Guide for the Care and Use of Animals under Assurance Number A3873-1.

### **Comparison of *in vivo* tumorigenicity of methionine-addicted parental cancer cells and methionine-independent revertants in a subcutaneous mouse model**

Two different doses of HCT 116 and HCT 116-R cells ( $5 \times 10^5$  or  $1 \times 10^6$  cells / 100  $\mu$ l PBS each) and were injected subcutaneously into the flanks of nude mice. Each group comprised ten mice. H460 and H460-R ( $2.5 \times 10^5$  cells / 100  $\mu$ l) were also injected subcutaneously to five mice in each group. The mice with HCT 116 or HCT 116-R tumor were sacrificed on day 28 and tumor volume was measured at termination.

### **Comparison of methionine-addicted parental cancer cells and methionine-independent revertants to forma experimental liver-metastasis**

HCT 116-GFP and HCT 116-R-GFP ( $1 \times 10^6$  cells / 100  $\mu$ l PBS) were injected to the spleen of nude mice. Each group comprised three mice. The mice were sacrificed on day 42 and fluorescence intensity was measured at termination with the UVP ChemStudio (Analytik Jena US LLC).

### **H & E staining and immunohistochemistry**

Hematoxylin and eosin (H&E) staining and immunohistochemical staining (IHC) were performed as described<sup>26</sup>. Rabbit polyclonal anti-Ki-67 antibody (1:16,000, 27309-1-AP, Proteintech) was used as a cell proliferation marker. For immunohistological evaluation, two investigators (K.H. and Y.A.) selected the five most abundant regions of each tissue and counted Ki-67-positive cells (magnification, 400 $\times$ ) in each of the five regions.



## Statistical analyses

All statistical analyses were performed with JMP PRO ver. 15.0.0 (SAS Institute, Cary, NC, USA). Mann-Whitney's U test was used to compare between groups for animal studies. Bar graphs show the mean, and error bars express standard error of the mean. A probability value of  $P < 0.05$  was defined as statistically significant.

## Results

### **Methionine dependence is decreased in methionine-revertant cancer cells.**

We first evaluated the activity of rMETase *in vitro*. The level of methionine in the medium was decreased to 30% rapidly 1 hour after addition of 1 U/ml of rMETase (Fig. 1A). These results show that rMETase rapidly and extensively depletes the medium of methionine.

To compare the methionine requirement of methionine-addicted parental cancer cells and methionine-independent revertants derived from the parental cells, we then evaluated their cell proliferation kinetics under MR effected by rMETase and the  $IC_{50}$  of rMETase. The proliferation of parental methionine-addicted cancer cells arrested within 48-72 hours of MR. In contrast, methionine-independent revertants were able to continuously proliferate under MR, similar to normal cells<sup>10, 17, 18, 20</sup> (Fig. 1B). The sensitivity to rMETase was lower in revertant MIA PaCa-2 cells than parental MIA PaCa-2 cells, with the  $IC_{50}$  value was higher in revertant cells than parental cells (1.62 vs 0.67 U/ml, respectively) (Fig.1C). These results indicate that the revertants have lost their methionine addiction. Comparison of methionine use in normal medium which has excess methionine did not show a difference between methionine-addicted cancer cells and methionine-independent revertants over 96 hours (data not shown). Future experiments will compare the two cell types of growth limiting

concentration of methionine.

### **Overmethylation of histone H3 does not occur in methionine-independent revertants.**

We compared the methylation status of histone H3 lysine in methionine-independent revertants and their methionine-addicted parental cells. Parental cancer cells and methionine-independent revertants were cultured in normal medium for 96 hours and histones were extracted. The level of pan-methyl lysine of histone H3 was also strongly decreased in methionine-independent revertants (Fig. 2A) as well as in parental cancer cells under MR (Fig. 2B). The levels of H3K4me3, H3K9me3, H3K27me3, H3K36me3 and H3K79me3 were decreased in methionine-independent revertants, even without MR, compared to parental methionine-addicted cells (Fig. 2C). These results indicate that the decreased use of methionine for histone H3 lysine methylation was, at least in part, the basis of the methionine-independence of the revertants and their ability to revert, freeing them from methionine addiction.

### **Methionine-independent revertants lose malignancy.**

To compare the malignancy of parental methionine-addicted cancer cells and methionine-independent revertants derived from them, the tumorigenicity of the parental and revertant cells was compared in subcutaneous xenograft mouse models. Methionine-addicted parental cancer cells (HCT 116 and H460) and their methionine-independent revertants (HCT 116-R and H460-R, respectively) were compared for their ability to form tumors in nude mice. The mean tumor volume was significantly lower in HCT 116-R tumors than HCT 116 tumors after injection of  $1 \times 10^6$  cells to nude mice ( $P = 0.0085$ ), and only half of 10 mice formed tumors in HCT 116-R compared to all mice with HCT 116 (Fig. 3A). While 8 out of 10 mice injected with  $5 \times 10^5$  parental HCT 116 cells formed tumors, no mice injected with 5

$\times 10^5$  HCT 116-R cells formed tumors (Fig. 3B). The H460-R revertants formed no tumors in all 5 nude mice when  $2.5 \times 10^5$  cells were injected compared to the H460 parents which formed tumors in all 5 mice after injection of the same amount of cells (Fig.3C).

The metastatic potential of HCT 116-GFP cells and HCT116-R-GFP cells was also compared after spleen injection in nude mice. The parental HCT 116-GFP cells formed significantly more liver metastasis compared to revertant HCT-116-R-GFP cells ( $p = 0.011$ )(Fig. 3D).

Immunohistochemistry staining showed that the number of Ki-67-positive cells was significantly lower in the HCT 116-R subcutaneous tumors compared to the parental HCT 116 subcutaneous tumors ( $n = 4$ ,  $P < 0.0001$ ) (Fig. 4A, B).

Immunoblotting showed that the levels of pan-methyl lysine of H3, H3K4me3, H3K9me3, H3K27me3, H3K36me3 and H3K79me3 were much lower in HCT 116-R tumors than in HCT 116 tumors (Fig. 4C, D). These results indicated that malignancy was decreased in methionine-independent revertants compared to parental methionine-addicted cancer cells, due to the decrease in histone H3 lysine methylation. The results of the present study and our previous study<sup>25</sup> indicate that overmethylation of lysines in histone H3 is necessary for both methionine addiction of cancer cells and their malignancy.

## Discussion

Methionine dependence of cancer has been known since 1959 when Sugimura showed that tumors in rats slowed their growth when methionine was removed from their diet compared to when other amino acids were removed from the diet<sup>27</sup>. It was not until the early 1970s that methionine dependence was found in cultured cancer cells<sup>28, 29</sup> and it was initially claimed that methionine dependence was due to reduced ability of the cancer cells to synthesize methionine from homocysteine<sup>29</sup>. At that time in 1976<sup>6</sup>, one of us (RMH) demonstrated that cultured methionine-dependent cancer cells made normal or

more-than-normal amounts of methionine from homocysteine, but still required exogenous methionine in order to proliferate<sup>6</sup>, first demonstrating that cancer cells were methionine addicted. The requirement for exogenous methionine by methionine-addicted cancer cells was later confirmed by Tisdale in 1984<sup>30</sup> and in 2019 by Tam's group<sup>3</sup>.

We previously showed that an increase this rate of synthesis of methionine from homocysteine was not necessary for reversion to methionine independence, further demonstrates that decreased methionine synthetic capacity was not the basis of methionine dependence. Then we found that despite the large amounts of endogenous methionine made by cancer cells, under restriction of exogenous methionine, the cancer cells had very low levels of free methionine, low levels of S-adenosylmethionine (SAM) and a low ratio of SAM to S-adenosylhomocysteine (SAH) compared to normal cells and methionine-independent revertants<sup>7-9</sup>. This was explained next when we observed that all cancer cells tested had elevated rates of transmethylation compared to normal cells which used excess amounts of methionine and SAM and depleted their cellular pools<sup>15</sup>. We then understood that methionine addiction was due to overuse of methionine for transmethylation<sup>15</sup>. This was confirmed when it was demonstrated that overall transmethylation was strongly reduced in methionine-independent revertants derived from the methionine-addicted cancer cells<sup>19,20</sup>. The phenomenon of methionine-addicted cancer cells was later termed the Hoffman-effect<sup>16</sup>.

Tam's group in 2019<sup>3</sup>, confirmed our results of 44 years previously<sup>6</sup> of high methionine flux in tumor-initiating cancer cells resulting in a requirement for exogenous methionine for their proliferation. Tam et al. showed abundant levels of tri-methyl histone H3 in tumor-initiating cells, compared to cancer cells which were not tumor-initiating cells<sup>3</sup>. However, the levels of tri-methyl histone H3 in normal cells were not measured by Tam et al. Tam's group showed that MR eliminated tumor-initiating cells<sup>3</sup>, similar to our previous

observation that MR eliminated clonogenic cancer cells <sup>11</sup>. Mentch showed that tri-methyl histone H3 was unstable in cancer cells under MR but did not examine the stability of tri-methyl histone H3 in normal cells under MR <sup>31</sup>. Our recent previous study also demonstrated that histone H3K4me3 and H3K9me3 were unstable in cancer cells under MR; and we showed for the first time H3K4me3 and H3K9me3 were stable in normal cells under MR <sup>25</sup>, which explains why cancer cells arrest under MR and normal cells do not.

And most importantly, the present study shows that pan-methylation of histone H3 and all of trimethylated histone H3 marks are not over methylated in methionine-independent revertants that have decreased malignancy and lost methionine addiction, and can proliferate under MR. The present study and our recent study <sup>25</sup> indicate that malignant cells require histone H3 overmethylation in order to grow *in vitro* and to form tumors and metastasis.

The present study thus shows that pan-overmethylated lysines of histone H3, including H3K4me3 and H3K9me3, explain at least in part the fate of an important set of methyl-groups in cancer cells and why cancer cells are methionine addicted and not normal or revertant cells. Most importantly, pan-methyl lysine of histone H3 and marks H3K4me3 and H3K9me3 are not overmethylated in normal cells and low-malignancy methionine-independent revertants, derived from methionine-addicted cancer cells. The methionine-independent revertants isolated from SV-40-transformed human fibroblasts <sup>10, 17</sup> and revertants of triple negative breast cancer cells had reduced clonogenicity in agar, a surrogate maker of malignancy <sup>18</sup>, giving the first hints that methionine addiction was necessary for malignancy. Our present results therefore indicate overmethylation of pan-methyl lysine of histone H3 and trimethyl histone H3 marks is necessary for malignancy as indicated by tumorigenicity and metastasis, both of which were reduced in methionine-independent revertants with greatly reduced or eliminated methylation of histone H3 lysine marks.

Although methionine-addicted cancer cells and methionine-independent revertants grew similarly *in vitro* in the presence of methionine, the revertants had greatly reduced malignancy as seen by reduced tumorigenicity and metastasis, similarly that non-cancer cells such as fibroblasts do not form tumors *in vivo*<sup>32</sup>. All tested cancer types are methionine addicted as shown *in vitro*, even if they can grow in homocysteine in place of methionine<sup>33</sup>,<sup>34</sup>, and tumors *in vivo* have been universally shown to be sensitive to MR, either by a methionine-free diet or methioninase treatment<sup>12, 34-40</sup>. These results indicate that methionine addiction, due at least in part to histone H3 lysine overmethylation, is a general hallmark of cancer. Our results also suggest that methionine addiction is the most fundamental hallmark of cancer, as it is necessary for malignancy.

It is possible that the histone H3 lysine methylation marks function as genetic switches<sup>41</sup> that turn on or off large number of genes necessary for malignant transformation. For example, we and other investigators have previously reported that MR increased TNF-related apoptosis-induced ligand receptor-2 (TRAIL-R2) expression in cancer cells and enhanced the efficacy of TRAIL-R2 targeted therapy<sup>26, 42</sup>. These and other phenotypic changes associated with malignancy, such as aneuploidy<sup>43</sup>, may result from the global genomic changes due to histone H3 overmethylation in cancer<sup>19</sup>. This will be investigated in further studies. The reprogramming of methionine metabolism<sup>44</sup> in cancer may be initiated by activated oncogenes as suggested by Vanhamme and Szpirer and Sacco et al.<sup>45, 46</sup> where they showed that activated *H-ras* or *K-ras* oncogenes, when transfected into normal cells, caused them to become methionine addicted. It has also been shown that viral infection of normal cells induces methionine addiction<sup>47</sup>. The reprogramming of methionine metabolism resulting in methionine addiction, histone H3 lysine overmethylation and malignancy may be a result of overexpression of specific histone H3 lysine methyltransferases<sup>48</sup>. Gene expression change between methionine-addicted cancer cells and methionine-independent

revertants will be investigated in future studies using chromatin immunoprecipitation (ChIP).

Also important is the finding by Breillout et al. that as cells become more malignant they become more methionine addicted<sup>32</sup>. Another important observation is from PET imaging of cancer in patients which consistently shows that [<sup>11</sup>C] methionine gives a much stronger PET signal than [<sup>18</sup>F] deoxyglucose in head-to-head comparisons, demonstrating that cancers are methionine addicted in patients and that the Hoffman-effect is stronger than Warburg-effect<sup>49,50</sup>. Other molecules, such as various RNAs, may also be overmethylated in cancer cells<sup>51,52</sup>. Further experiments are necessary to account for all the transferred methyl groups in cancers.

In summary, our results suggest that overmethylation of histone H3 lysine is linked with methionine addiction and malignancy of cancer cells, and possibly necessary for both fundamental hallmarks of cancer. Methionine addiction is being widely recognized<sup>53</sup> and may provide a universal target for methionine-restriction cancer therapy, such as with methioninase which depletes methionine in the tumors rapidly<sup>54</sup>, since methionine addiction is a general and fundamental hallmark of cancer.

Acknowledgements: This work was supported in part by a Yokohama City University research grant “KAMOME Project”. The study was also supported in part by the Robert M. Hoffman Foundation for Cancer Research. Neither organization had a role in the design, execution, interpretation, or writing of the study. This paper is dedicated to the memory of A.

R. Moossa, M.D., Sun Lee, M.D., Professor Li Jiayi and Masaki Kitajima, MD.

Disclosure Statement: JY, SI, NS, YS, KH, YT, YA, HN and RMH are or were unsalaried associates of AntiCancer Inc. QH is an employee of Anticancer Inc.. The Authors declare that there are no potential conflicts of interest.



## References

- 1 Gao X, Sanderson SM, Dai Z, et al. Dietary methionine influences therapy in mouse cancer models and alters human metabolism. *Nature*. 2019.
- 2 Sanderson SM, Gao X, Dai Z, Locasale JW. Methionine metabolism in health and cancer: a nexus of diet and precision medicine. *Nat Rev Cancer*. 2019; 19: 625-637.
- 3 Wang Z, Yip LY, Lee JHJ, et al. Methionine is a metabolic dependency of tumor-initiating cells. *Nature medicine*. 2019; 25: 825-837.
- 4 Yamamoto J, Han Q, Inubushi S, et al. Histone methylation status of H3K4me3 and H3K9me3 under methionine restriction is unstable in methionine-addicted cancer cells, but stable in normal cells. *Biochem Biophys Res Commun*. 2020; 533: 1034-1038.
- 5 Aoki Y, Yamamoto J, Tome Y, et al. Histone H3K4me3 and H3K9me3 are super over-methylated in soft tissue sarcoma compared to normal muscle in patient-derived xenograft (PDX) mouse models: an indicator of cancer methionine addiction. *bioRxiv*. 2021: 2021.2001.2001.425040.
- 6 Hoffman RM, Erbe RW. High in vivo rates of methionine biosynthesis in transformed human and malignant rat cells auxotrophic for methionine. *Proc Natl Acad Sci*. 1976; 73: 1523.

- 7 Coalson DW, Mecham JO, Stern PH, Hoffman RM. Reduced availability of endogenously synthesized methionine for S-adenosylmethionine formation in methionine-dependent cancer cells. *Proc Natl Acad Sci*. 1982; 79: 4248-4251.
- 8 Stern PH, Mecham JO, Wallace CD, Hoffman RM. Reduced free-methionine in methionine-dependent SV40-transformed human fibroblasts synthesizing apparently normal amounts of methionine. *J Cell Physiol*. 1983; 117: 9-14.
- 9 Stern PH, Wallace CD, Hoffman RM. Altered methionine metabolism occurs in all members of a set of diverse human tumor cell lines. *J Cell Physiol*. 1984; 119: 29-34.
- 10 Hoffman RM, Jacobsen SJ, Erbe RW. Reversion to methionine independence by malignant rat and SV40-transformed human fibroblasts. *Biochem Biophys Res Commun*. 1978; 82: 228-234.
- 11 Hoffman RM, Jacobsen SJ. Reversible growth arrest in simian virus 40-transformed human fibroblasts. *Proc Natl Acad Sci*. 1980; 77: 7306.
- 12 Guo H, Lishko VK, Herrera H, Groce A, Kubota T, Hoffman RM. Therapeutic tumor-specific cell cycle block induced by methionine starvation in vivo. *Cancer research*. 1993; 53: 5676-5679.
- 13 Yano S, Li S, Han Q, et al. Selective methioninase-induced trap of cancer cells in S/G2 phase visualized by FUCCI imaging confers chemosensitivity. *Oncotarget*. 2014; 5: 8729-8736.

- 14 Stern PH, Hoffman RM. Enhanced in vitro selective toxicity of chemotherapeutic agents for human cancer cells based on a metabolic defect. *J Natl Cancer Inst.* 1986; 76: 629-639.
- 15 Stern PH, Hoffman RM. Elevated overall rates of transmethylation in cell lines from diverse human tumors. *In Vitro.* 1984; 20: 663-670.
- 16 Kaiser P. Methionine Dependence of Cancer. *Biomolecules.* 2020; 10.
- 17 Hoffman RM, Jacobsen SJ, Erbe RW. Reversion to methionine independence in simian virus 40-transformed human and malignant rat fibroblasts is associated with altered ploidy and altered properties of transformation. *Proc Natl Acad Sci.* 1979; 76: 1313.
- 18 Borrego SL, Fahrman J, Datta R, et al. Metabolic changes associated with methionine stress sensitivity in MDA-MB-468 breast cancer cells. *Cancer Metab.* 2016; 4: 9.
- 19 Hoffman RM. The wayward methyl group and the cascade to cancer. *Cell cycle (Georgetown, Tex).* 2017; 16: 825-829.
- 20 Judde JG, Ellis M, Frost P. Biochemical analysis of the role of transmethylation in the methionine dependence of tumor cells. *Cancer research.* 1989; 49: 4859-4865.
- 21 Bouvet M, Tsuji K, Yang M, Jiang P, Moossa AR, Hoffman RM. In vivo color-coded imaging of the interaction of colon cancer cells and splenocytes in the formation of

- liver metastases. *Cancer research*. 2006; 66: 11293-11297.
- 22 Kudou D, Misaki S, Yamashita M, et al. Structure of the antitumour enzyme L-methionine gamma-lyase from *Pseudomonas putida* at 1.8 Å resolution. *J Biochem*. 2007; 141: 535-544.
- 23 Tan Y, Xu M, Tan X, et al. Overexpression and Large-Scale Production of Recombinant L-Methionine- $\alpha$ -deamino- $\gamma$ -mercaptomethane-lyase for Novel Anticancer Therapy. *Protein Expr Puri*. 1997; 9: 233-245.
- 24 Sun X, Tan Y, Yang Z, Li S, Hoffman RM. A rapid HPLC method for the measurement of ultra-low plasma methionine concentrations applicable to methionine depletion therapy. *Anticancer Res*. 2005; 25: 59-62.
- 25 Yamamoto J, Han Q, Inubushi S, et al. Histone methylation status of H3K4me3 and H3K9me3 under methionine restriction is unstable in methionine-addicted cancer cells, but stable in normal cells. *Biochem Biophys Res Commun*. 2020.
- 26 Yamamoto J, Miyake K, Han Q, et al. Oral recombinant methioninase increases TRAIL receptor-2 expression to regress pancreatic cancer in combination with agonist tigatuzumab in an orthotopic mouse model. *Cancer Lett*. 2020.
- 27 Sugimura T, Birnbaum SM, Winitz M, Greenstein JP. Quantitative nutritional studies with water-soluble, chemically defined diets. VIII. The forced feeding of diets each lacking in one essential amino acid. *Arch Biochem Biophys*. 1959; 81: 448-455.

- 28 Chello PL, Bertino JR. Dependence of 5-methyltetrahydrofolate utilization by L5178Y murine leukemia cells in vitro on the presence of hydroxycobalamin and transcobalamin II. *Cancer research*. 1973; 33: 1898-1904.
- 29 Halpern BC, Clark BR, Hardy DN, Halpern RM, Smith RA. The effect of replacement of methionine by homocystine on survival of malignant and normal adult mammalian cells in culture. *Proc Natl Acad Sci*. 1974; 71: 1133-1136.
- 30 Tisdale MJ. Utilization of preformed and endogenously synthesized methionine by cells in tissue culture. *Br J Cancer*. 1984; 49: 315-320.
- 31 Mentch SJ, Mehrmohamadi M, Huang L, et al. Histone Methylation Dynamics and Gene Regulation Occur through the Sensing of One-Carbon Metabolism. *Cell Metab*. 2015; 22: 861-873.
- 32 Breillout F, Antoine E, Poupon MF. Methionine dependency of malignant tumors: a possible approach for therapy. *J Natl Cancer Inst*. 1990; 82: 1628-1632.
- 33 Mecham JO, Rowitch D, Wallace CD, Stern PH, Hoffman RM. The metabolic defect of methionine dependence occurs frequently in human tumor cell lines. *Biochem Biophys Res Commun*. 1983; 117: 429-434.
- 34 Tan Y, Xu M, Hoffman RM. Broad selective efficacy of rMETase and PEG-rMETase on cancer cells in vitro. *Anticancer Res*. 2010; 30: 793-798.
- 35 Goseki N, Yamazaki S, Shimojyu K, et al. Synergistic effect of methionine-depleting

- total parenteral nutrition with 5-fluorouracil on human gastric cancer: a randomized, prospective clinical trial. *Jpn J Cancer Res.* 1995; 86: 484-489.
- 36 Hoshiya Y, Guo H, Kubota T, et al. Human tumors are methionine dependent in vivo. *Anticancer Res.* 1995; 15: 717-718.
- 37 Tan Y, Xu M, Guo H, Sun X, Kubota T, Hoffman RM. Anticancer efficacy of methioninase in vivo. *Anticancer Res.* 1996; 16: 3931-3936.
- 38 Tan Y, Sun X, Xu M, et al. Efficacy of recombinant methioninase in combination with cisplatin on human colon tumors in nude mice. *Clinical cancer research : an official journal of the American Association for Cancer Research.* 1999; 5: 2157-2163.
- 39 Hoffman RM. Development of recombinant methioninase to target the general cancer-specific metabolic defect of methionine dependence: a 40-year odyssey. *Expert Opin Biol Ther.* 2015; 15: 21-31.
- 40 Kawaguchi K, Miyake K, Han Q, et al. Oral recombinant methioninase (o-rMETase) is superior to injectable rMETase and overcomes acquired gemcitabine resistance in pancreatic cancer. *Cancer Lett.* 2018; 432: 251-259.
- 41 Ptashne M. A Genetic Switch, Third Edition edn: Cold Spring Harbor Laboratory Press, 2004
- 42 Strelakova E, Malin D, Good DM, Cryns VL. Methionine Deprivation Induces a Targetable Vulnerability in Triple-Negative Breast Cancer Cells by Enhancing TRAIL

- Receptor-2 Expression. *Clinical cancer research : an official journal of the American Association for Cancer Research*. 2015; 21: 2780-2791.
- 43 Bloomfield M, Duesberg P. Karyotype alteration generates the neoplastic phenotypes of SV40-infected human and rodent cells. *Mol Cytogenet*. 2015; 8: 79.
- 44 DeBerardinis RJ, Lum JJ, Hatzivassiliou G, Thompson CB. The biology of cancer: metabolic reprogramming fuels cell growth and proliferation. *Cell Metab*. 2008; 7: 11-20.
- 45 Vanhamme L, Szpirer C. Methionine metabolism defect in cells transfected with an activated HRAS1 oncogene. *Exp Cell Res*. 1987; 169: 120-126.
- 46 De Sanctis G, Spinelli M, Vanoni M, Sacco E. K-Ras Activation Induces Differential Sensitivity to Sulfur Amino Acid Limitation and Deprivation and to Oxidative and Anti-Oxidative Stress in Mouse Fibroblasts. *PloS one*. 2016; 11: e0163790.
- 47 Koziorowska J, Mazurowa N, Tautt J. Methionine dependence of virus-infected cells. *Exp Cell Res*. 1990; 190: 290-293.
- 48 Wong CM, Wei L, Law CT, et al. Up-regulation of histone methyltransferase SETDB1 by multiple mechanisms in hepatocellular carcinoma promotes cancer metastasis. *Hepatology*. 2016; 63: 474-487.
- 49 Pirotte B, Goldman S, Massager N, et al. Comparison of 18F-FDG and 11C-methionine for PET-guided stereotactic brain biopsy of gliomas. *J Nucl Med*.

2004; 45: 1293-1298.

- 50 Hoffman RM. L-[Methyl-(11)C] Methionine-Positron-Emission Tomography (MET-PET). In: Hoffman RM, ed. *Methods Mol Biol*. 2019/02/07 edn. New York: Human Press, 2019; 267-271.
- 51 Birnstiel ML, Fleissner E, Borek E. NUCLEOLUS: A CENTER OF RNA METHYLATION. *Science*. 1963; 142: 1577-1580.
- 52 Tisdale MJ. Effect of methionine deprivation on methylation and synthesis of macromolecules. *Br J Cancer*. 1980; 42: 121-128.
- 53 Kanarek N, Petrova B, Sabatini DM. Dietary modifications for enhanced cancer therapy. *Nature*. 2020; 579: 507-517.
- 54 Kawaguchi K, Han Q, Li S, et al. Intra-tumor L-methionine level highly correlates with tumor size in both pancreatic cancer and melanoma patient-derived orthotopic xenograft (PDOX) nude-mouse models. *Oncotarget*. 2018; 9: 11119-11125.



## Figure legends

Figure 1. Methionine dependence is decreased in methionine-revertant cancer cells *in vitro*.

(A) rMETase activity assay *in vitro*. rMETase was added to the medium (1 U/ml) and the methionine levels in the medium were measured at 0 hour, 15 minutes, 30 minutes, 1 hour, 3 hours, 6 hours and 24 hours (n = 3). (B) Cell proliferation assay of methionine-addicted parental cancer cells and their methionine-independent revertants under methionine restriction. Cells were cultured in normal medium or medium with rMETase (1 U/ml) for 24, 48, 72 and 96 h (mean  $\pm$  SEM, n = 3). (C) Sensitivity to rMETase. The parental MIA PaCa-2 cells and its revertant MIA PaCa-2-R cells were cultured for 96 h with various concentrations of rMETase (mean  $\pm$  SEM, n = 3).

Figure 2. Methionine-independent revertants have lower levels pan-methyl H3 lysine and trimethyl histone H3 marks compared to their parental methionine-addicted cancer cells *in vitro*.

(A) Immunoblot of pan-methyl lysine of H3 in methionine-addicted cancer cells, methionine-independent revertants and normal fibroblasts grown in normal medium. (B) Immunoblot of pan-methyl H3 lysine in methionine-addicted cancer cells and normal fibroblasts grown in normal medium or medium with rMETase (1 U/ml) for 96 hours. (C) Immunoblot of H3K4me3, H3K9me3, H3K27me3, H3K36me3 and H3K79me3 in

methionine-addicted cancer cells and methionine-independent revertants grown in normal medium.

Figure 3. Low-malignancy methionine-independent revertants have less tumorigenicity and metastatic potential than parental methionine-addicted cancer cells *in vivo*.

(A) Mean tumor volume of HCT 116 and HCT 116-R at 28 days after  $1 \times 10^6$  cells were injected (n = 10. \*, p < 0.01). (B) Tumor volume at day 28 of HCT 116 and HCT 116-R. (C) Representative tumor images of H460 and H460-R on 14 days after  $2.5 \times 10^5$  cells were injected. White arrow: tumors. (D) Experimental liver metastasis: parent methionine-addicted HCT 116-GFP and methionine-independent revertant HCT 116-R-GFP. Right representative fluorescence image of liver metastasis. Left Fluorescence density (mean  $\pm$  SEM, n = 3).

Figure 4 Low-malignancy methionine-independent revertants have lower Ki-67 and histone H3 methylation than parental methionine-addicted cancer cells *in vivo*.

(A) Representative images of H & E staining and immunohistochemical staining for Ki-67 of HCT 116 and HCT 116-R subcutaneous tumors. LPF: low power field (40 $\times$ ). HPF: high power field (200 $\times$ ). Scale bar: 100  $\mu$ m (H & E and HPF of Ki-67), 500  $\mu$ m (LPF of Ki-67). (B) Quantification of the Ki-67 positive cells. Five images were randomly obtained in high power fields (400 $\times$ ) and the positive cells compared (mean  $\pm$  SEM, n = 4). \*, p < 0.0001. (C)

Immunoblot of pan-methyl H3 lysine and trimethyl histone H3 marks in subcutaneous tumors formed from HCT 116 and HCT 116-R (n = 3). (D) The ratio of pan-methyl H3 lysine or trimethyl histone H3 marks / total H3 in the tumors formed from HCT 116 and HCT 116-R (mean  $\pm$  SEM, n = 3).

Figure 1

A

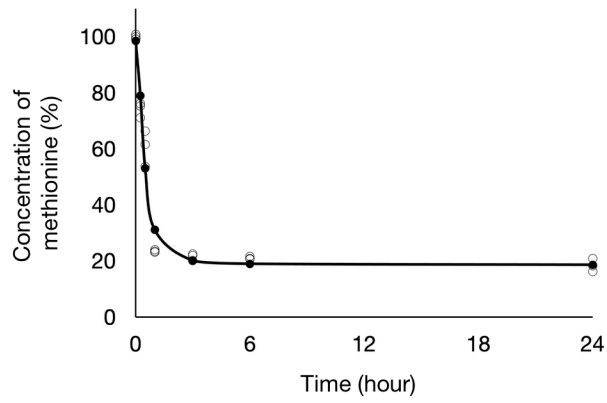

B

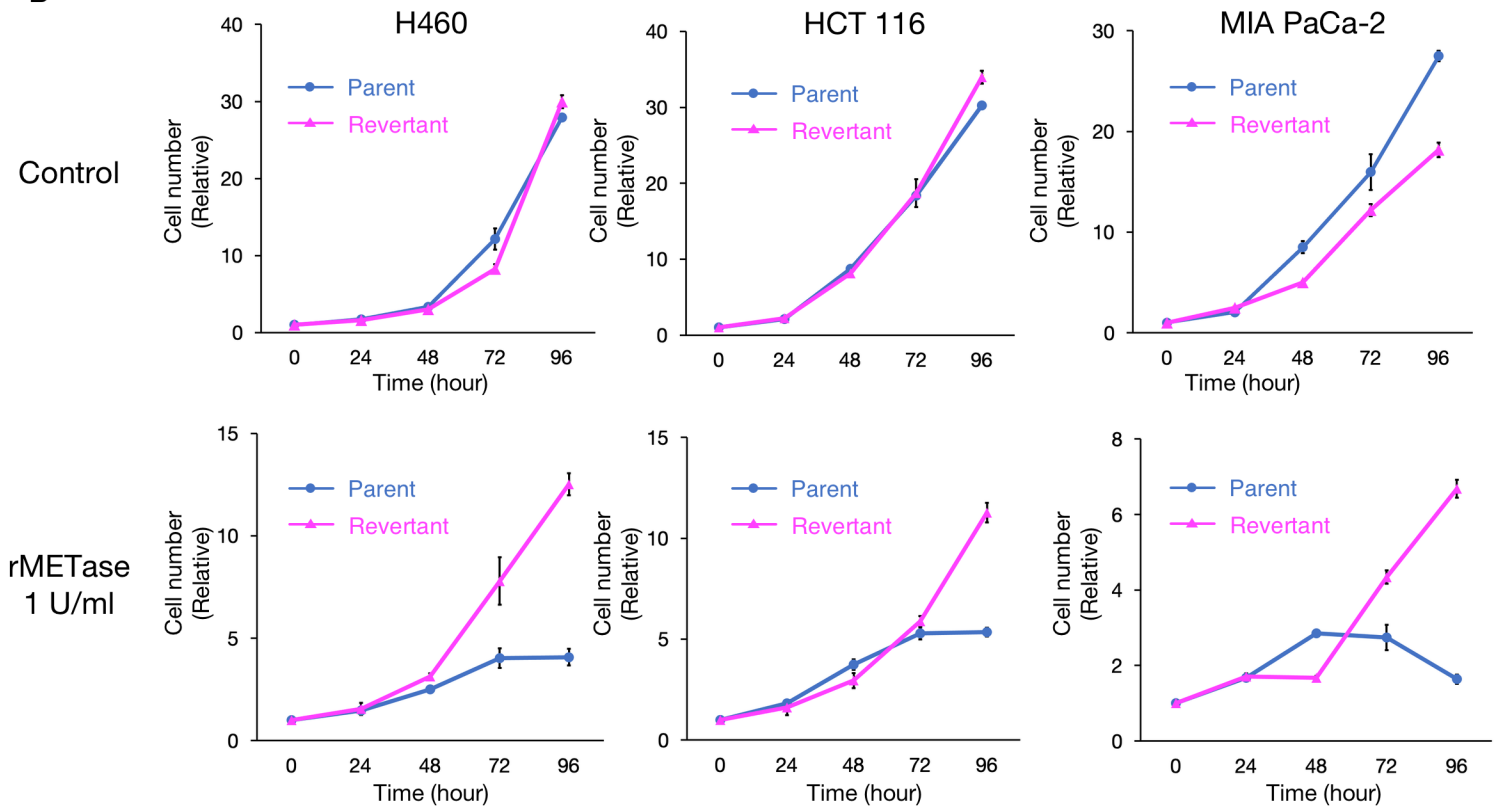

C

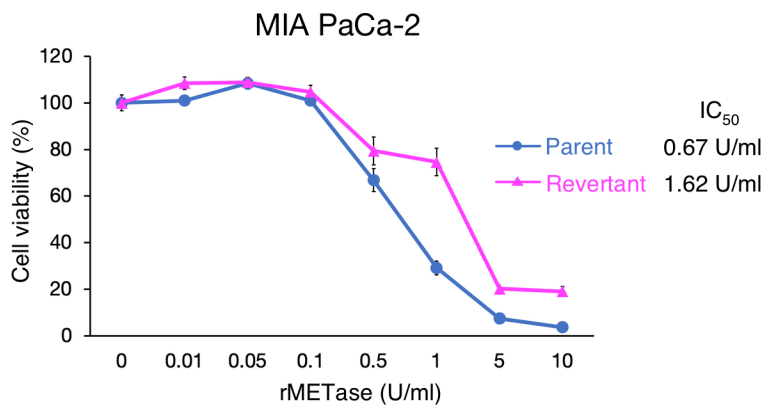

Figure 2

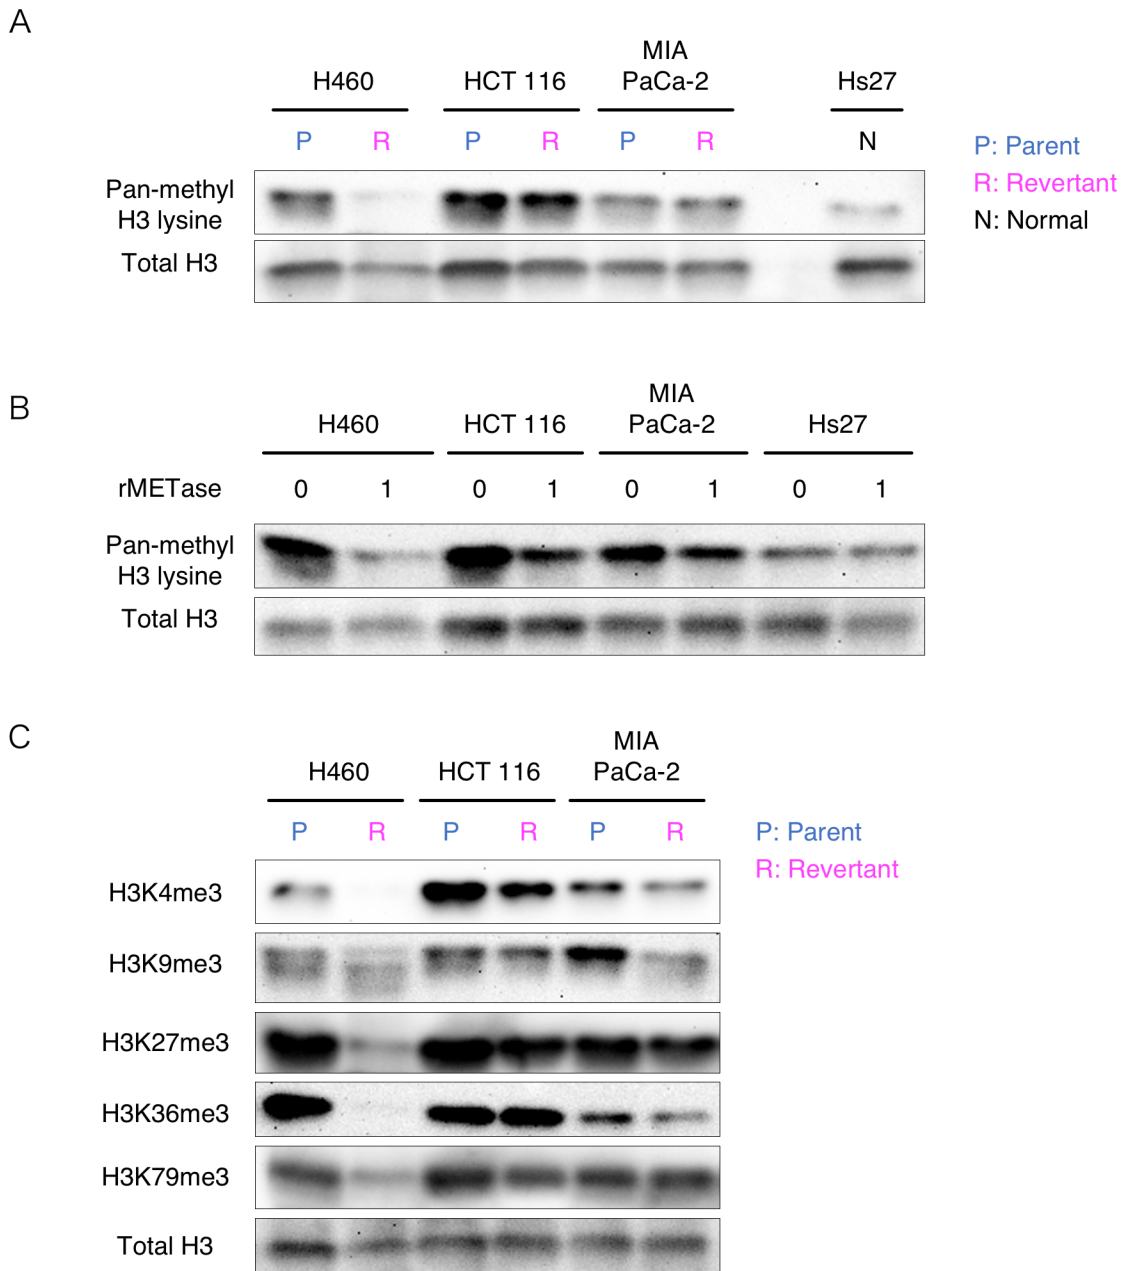

Figure 3

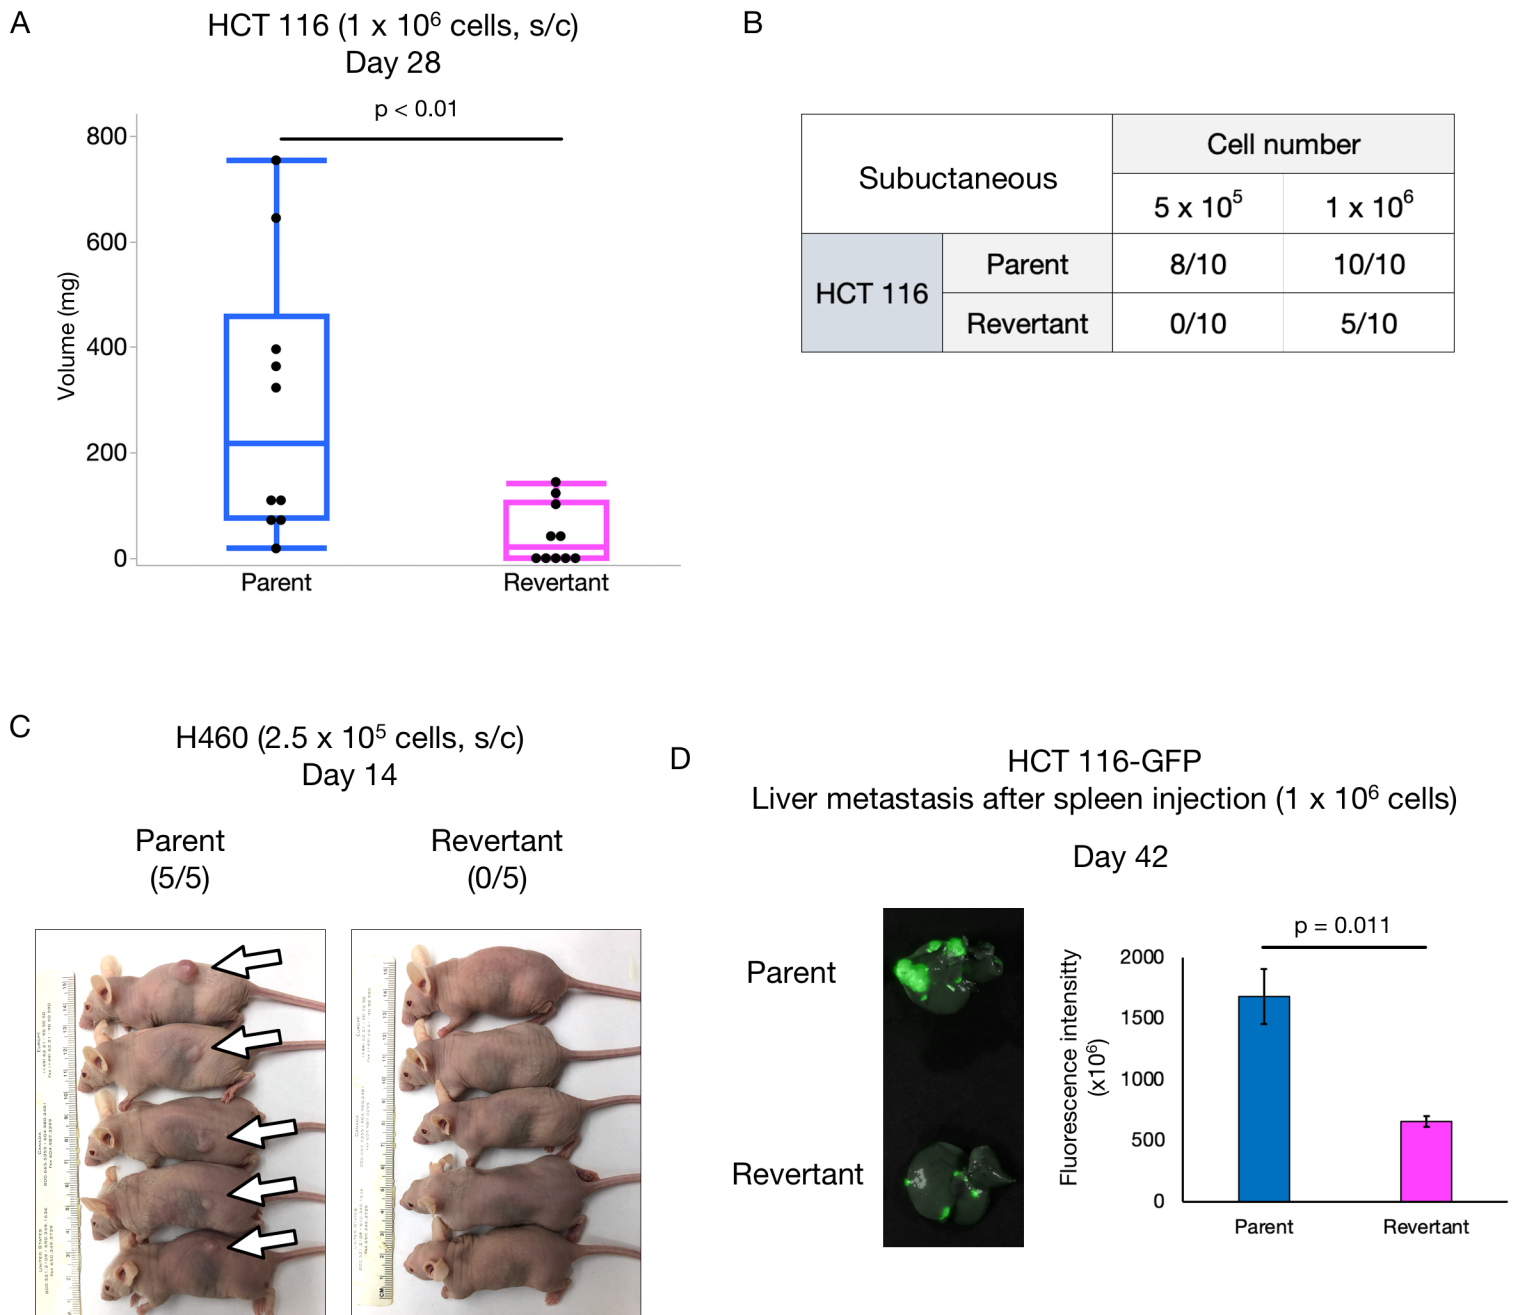

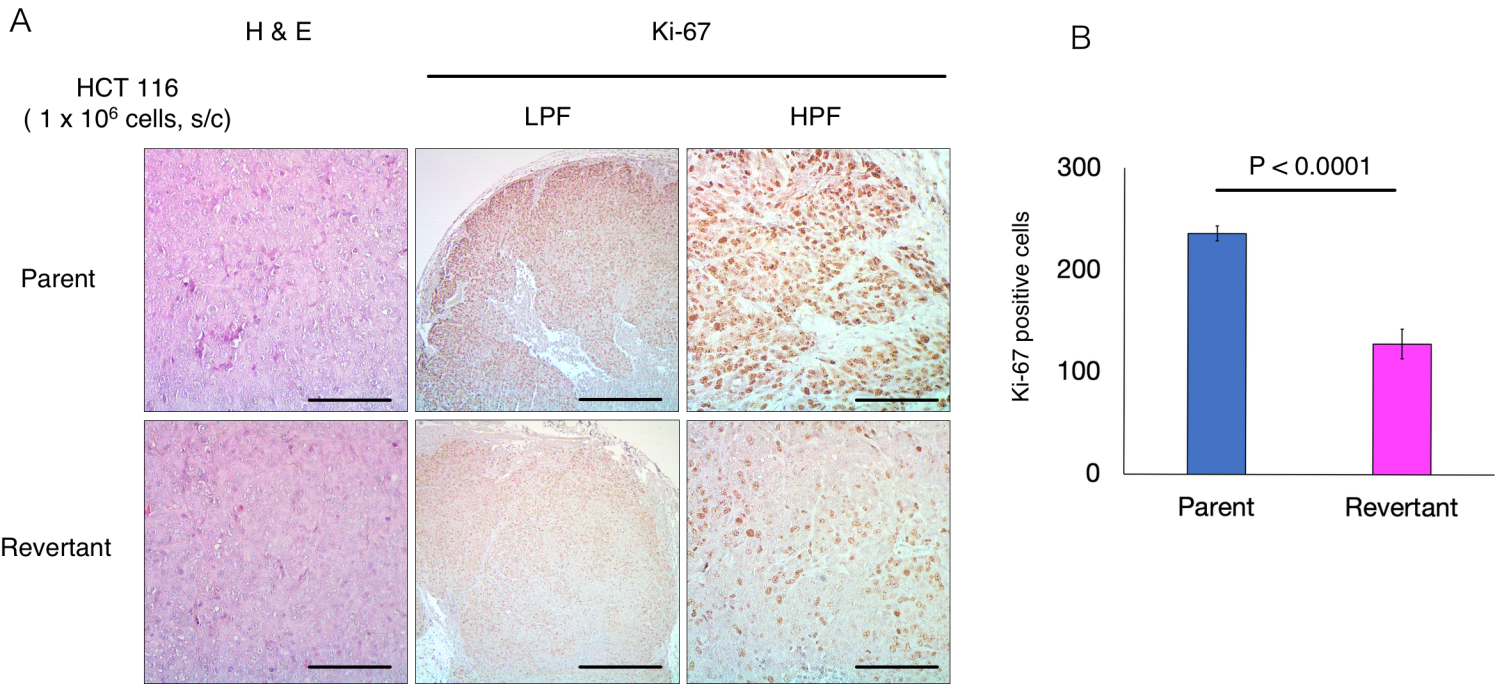

Source: https://www.biorxiv.org/content/10.1101/2020.12.04.412437v2.full.pdf
